# Supplementary material for: Understanding Blood versus Blond Orange Consumption: A Cross-Cultural Study in Four Countries
Source: MDPI journal article supplement (doi:10.3390/foods11172686), 2022-09-02
Supplement: s1 [file s1]

Supplementary Material

UNDERSTANDING BLOOD *VERSUS* BLOND ORANGE CONSUMPTION. A CROSS-CULTURAL STUDY IN FOUR COUNTRIES.

Giménez-Sanchis, A<sup>1</sup>., Zhong K.<sup>2</sup>, Pintor, A.<sup>3</sup>, Farina, V.<sup>4</sup>, Besada, C<sup>1</sup>

Figure S1. Pictures of blond (A) and blood (B) oranges shown in the questionnaire.

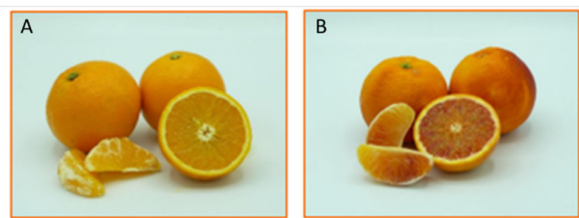

Table S1. Number of participants from each country who responded each section of the questionnaire

| Availability and consumption habit | Sections                        | Spain |       | Italy |       | Mexico |       | China |       |
|------------------------------------|---------------------------------|-------|-------|-------|-------|--------|-------|-------|-------|
|                                    |                                 | Blond | Blood | Blond | Blood | Blond  | Blood | Blond | Blood |
| Available and usually consumed     | Reasons to consume              |       |       |       |       |        |       |       |       |
|                                    | Sensory attributes' importance  | 517   | 104   | 554   | 459   | 542    | 207   | 447   | 279   |
|                                    | Consumption contexts            |       |       |       |       |        |       |       |       |
| Available but not consumed         | Consumption barriers            | 83    | 190   | 50    | 134   | 62     | 100   | 140   | 226   |
| Not available                      | Purchase intention if available |       |       |       |       |        |       |       |       |
|                                    | Liking expectation              | 5     | 311   | 1     | 12    | 1      | 298   | 18    | 100   |
|                                    | Attributes' expectation         |       |       |       |       |        |       |       |       |

**Table S2.** List of references used to create the preliminary lists of the questionnaire.

| References                              |                                                                                                                                                                                                            |
|-----------------------------------------|------------------------------------------------------------------------------------------------------------------------------------------------------------------------------------------------------------|
| Facilitators<br>(Reasons to<br>consume) | Onwezen & Bartels, 2011 [34]<br>Sijtsema et al., 2012 [23]<br>Phan et al., 2016 [25]<br>Iofrida et al., 2019 [38]<br>Di Vita et al., 2020 [39]<br>Kasprzak et al. 2021 [41]<br>Ingrassia et al., 2016 [36] |
| Sensory<br>attributes                   | Iofrida et al., 2019 [38]<br>Di Vita et al., 2020 [39]<br>Fernández-Serrano et al., 2020 [28]<br>Tarancón et al., 2020 [40]<br>Tarancón et al., 2021 [20]<br>Giménez-Sanchis et al., 2021 [42]             |
| Contexts                                | Jaeger et al., 2019 [37]<br>Di Vita et al., 2020 [39]<br>Verain et al., 2020 [32]<br>Tarancón et al., 2021 [27]                                                                                            |
| Barriers                                | Sijtsema et al., 2012 [23]<br>Silvestri et al., 2016 [35]<br>Kasprzak et al., 2021 [41]                                                                                                                    |

**Table S3.** Ranking of sensory attributes' importance for consumer satisfaction after eating blond/ blood oranges. Importance was scored in a 7-point scale (1-not important at all, 7-very important) by Spanish, Italian, Mexican and Chinese consumers (n=605 in each country). Mean scores are shown in brackets.

| Spain                        |                              | Italy                        |                              | Mexico                       |                              | China                        |                               |
|------------------------------|------------------------------|------------------------------|------------------------------|------------------------------|------------------------------|------------------------------|-------------------------------|
| Blond                        | Blood                        | Blond                        | Blood                        | Blond                        | Blood                        | Blond                        | Blood                         |
| Juicy (6.4) <sup>a</sup>     | Juicy (6.2) <sup>a</sup>     | Juicy (6.4) <sup>a</sup>     | Juicy (6.5) <sup>a</sup>     | Juicy (6.8) <sup>a</sup>     | Juicy (6.7) <sup>a</sup>     | Juicy (6.1) <sup>a</sup>     | Juicy (6.2) <sup>a</sup>      |
| Flavour (6.0) <sup>b</sup>   | Sweet (5.9) <sup>ab</sup>    | Flavour (6.3) <sup>a</sup>   | Flavour (6.3) <sup>b</sup>   | Sweet (6.4) <sup>b</sup>     | Sweet (6.5) <sup>ab</sup>    | Sweet (6.1) <sup>ab</sup>    | Sweet (6.0) <sup>ab</sup>     |
| Balance (6.0) <sup>b</sup>   | Balance (5.8) <sup>ab</sup>  | Aromatic (5.8) <sup>b</sup>  | Aromatic (6.0) <sup>c</sup>  | Balance (6.3) <sup>bc</sup>  | Flavour (6.2) <sup>bc</sup>  | Unfibrous (6.0) <sup>b</sup> | Aromatic (6.0) <sup>ab</sup>  |
| Sweet (5.8) <sup>c</sup>     | Flavour (5.8) <sup>ab</sup>  | Balance (5.8) <sup>b</sup>   | Sweet (5.8) <sup>c</sup>     | Flavour (6.1) <sup>c</sup>   | Balance (6.2) <sup>bc</sup>  | Aromatic (5.9) <sup>bc</sup> | Unfibrous (6.0) <sup>ab</sup> |
| Aromatic (5.6) <sup>d</sup>  | Aromatic (5.7) <sup>ab</sup> | Sweet (5.7) <sup>b</sup>     | Balance (5.8) <sup>c</sup>   | Aromatic (5.7) <sup>d</sup>  | Aromatic (6.0) <sup>cd</sup> | Flavour (5.9) <sup>bc</sup>  | Balance (6.0) <sup>ab</sup>   |
| Unfibrous (5.6) <sup>d</sup> | Colour (5.5) <sup>bc</sup>   | Colour (5.0) <sup>c</sup>    | Colour (5.3) <sup>d</sup>    | Unfibrous (5.7) <sup>d</sup> | Unfibrous (5.8) <sup>d</sup> | Balance (5.9) <sup>bc</sup>  | Flavour (6.0) <sup>ab</sup>   |
| Easy Pe (4.7) <sup>e</sup>   | Unfibrous (5.3) <sup>c</sup> | Unfibrous (4.5) <sup>d</sup> | Unfibrous (4.6) <sup>e</sup> | Colour (5.4) <sup>e</sup>    | Colour (5.8) <sup>d</sup>    | NoMessy (5.8) <sup>c</sup>   | NoMessy (5.9) <sup>bc</sup>   |
| Seedless (4.6) <sup>e</sup>  | Easy Pe (4.7) <sup>d</sup>   | Easy Pe (4.4) <sup>d</sup>   | Easy Pe (4.4) <sup>e</sup>   | Easy Pe (5.0) <sup>f</sup>   | Easy Pe (5.3) <sup>e</sup>   | Easy Pe (5.7) <sup>c</sup>   | Easy Pe (5.9) <sup>bc</sup>   |
| Colour (4.6) <sup>e</sup>    | Seedless (4.5) <sup>d</sup>  | Seedless (4.0) <sup>e</sup>  | Seedless (4.1) <sup>f</sup>  | NoMessy (3.9) <sup>g</sup>   | Seedless (4.5) <sup>f</sup>  | Seedless (5.4) <sup>d</sup>  | Seedless (5.7) <sup>c</sup>   |
| NoMessy (3.6) <sup>f</sup>   | NoMessy (3.9) <sup>e</sup>   | NoMessy (3.7) <sup>f</sup>   | NoMessy (3.9) <sup>g</sup>   | Seedless (3.8) <sup>g</sup>  | NoMessy (4.5) <sup>f</sup>   | Colour (5.1) <sup>e</sup>    | Colour (5.7) <sup>c</sup>     |

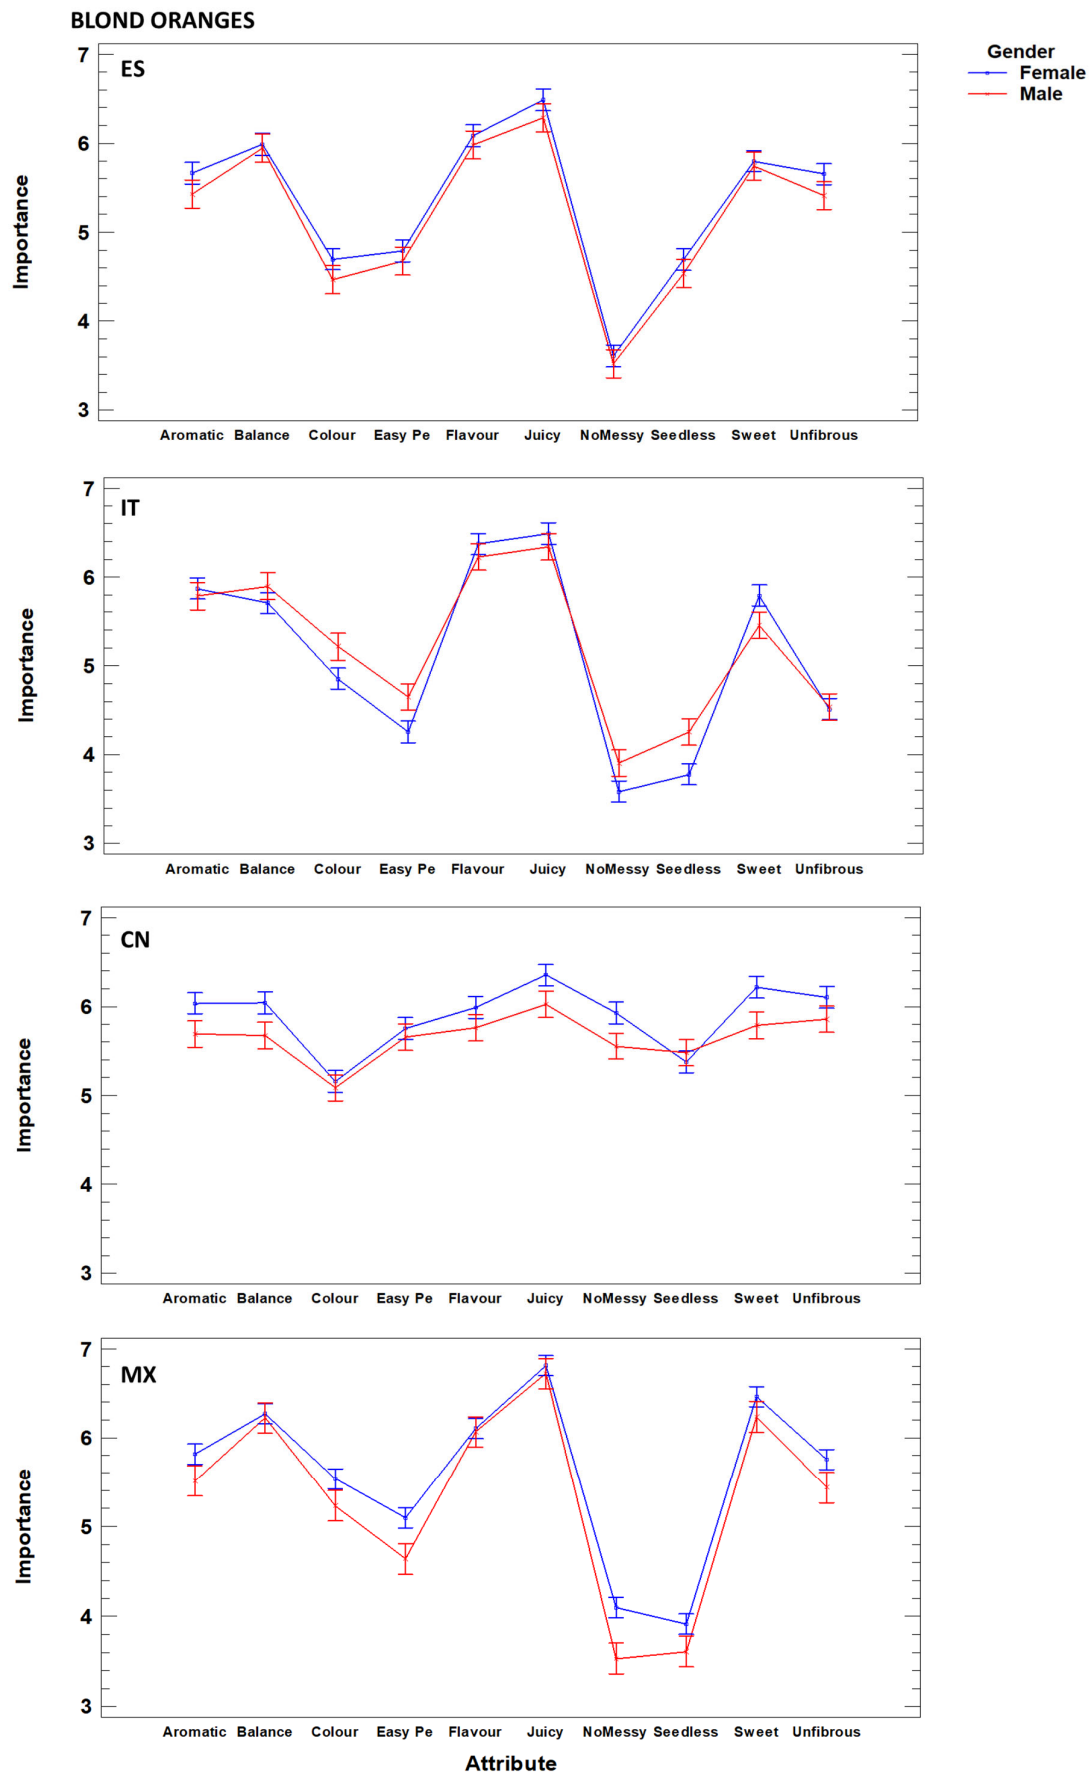

**Figure S2.** Effect of gender on the importance for satisfaction gave by consumers to different sensory attributes of blond oranges (1-not important at all, 7-very important). ES-Spain, IT-Italy, MX-Mexico, CN-China

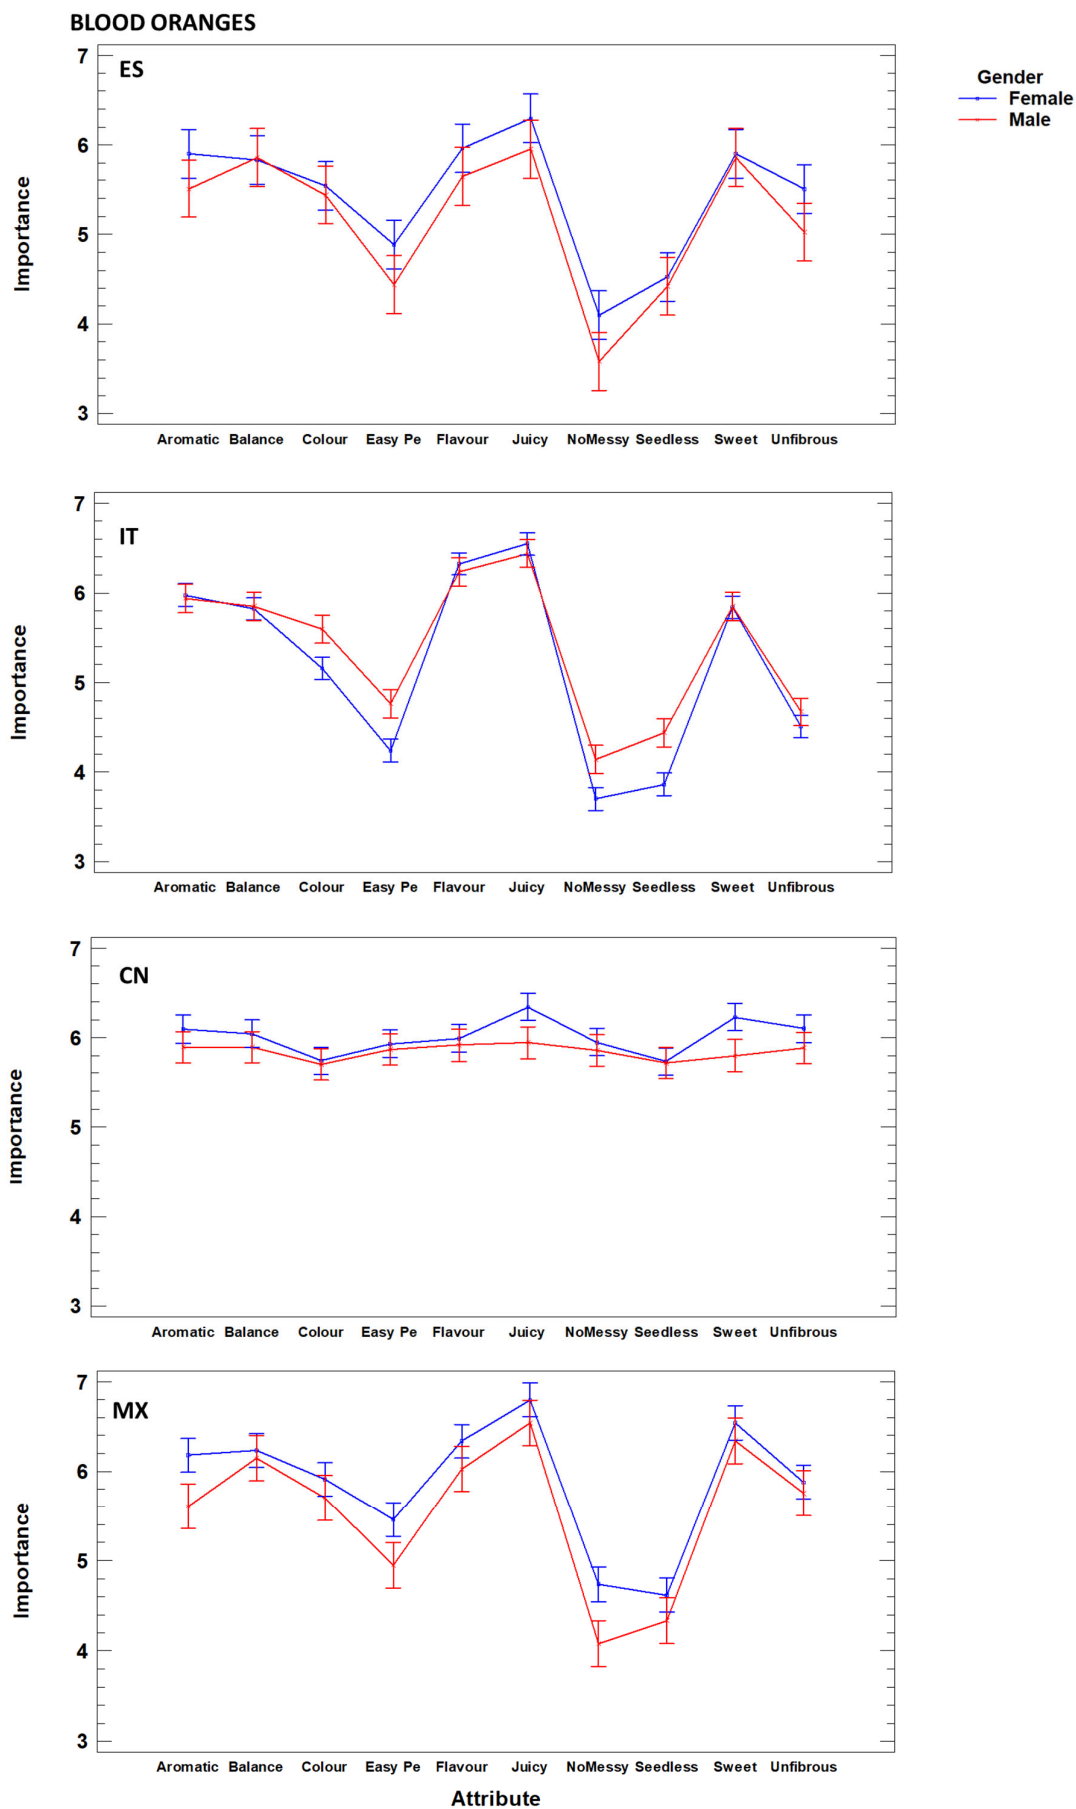

**Figure S3.** Effect of gender on the importance for satisfaction gave by consumers to different sensory attributes of blood oranges (1-not important at all, 7-very important). ES-Spain, IT-Italy, MX-Mexico, CN-China

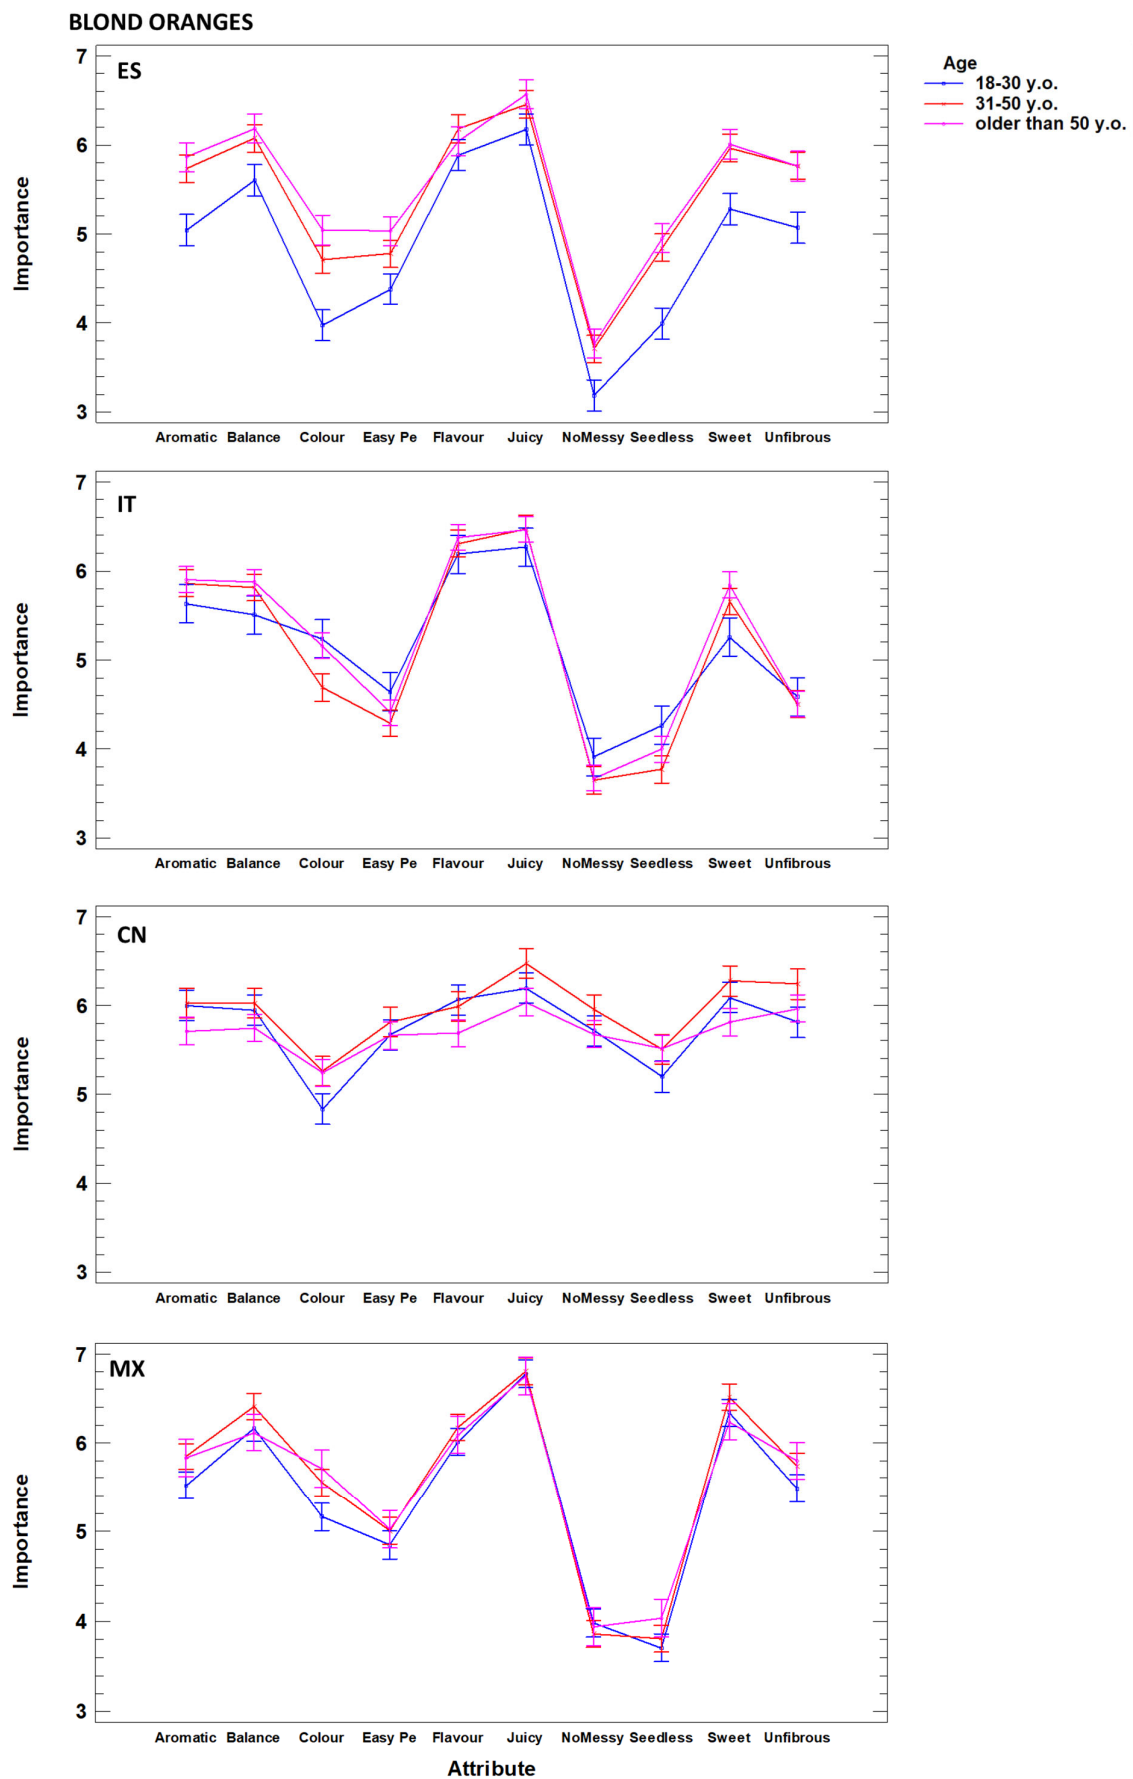

**Figure S4.** Effect of age range on the importance for satisfaction gave by consumers to different sensory attributes of blond oranges (1-not important at all, 7-very important). ES-Spain, IT-Italy, MX-Mexico, CN-China

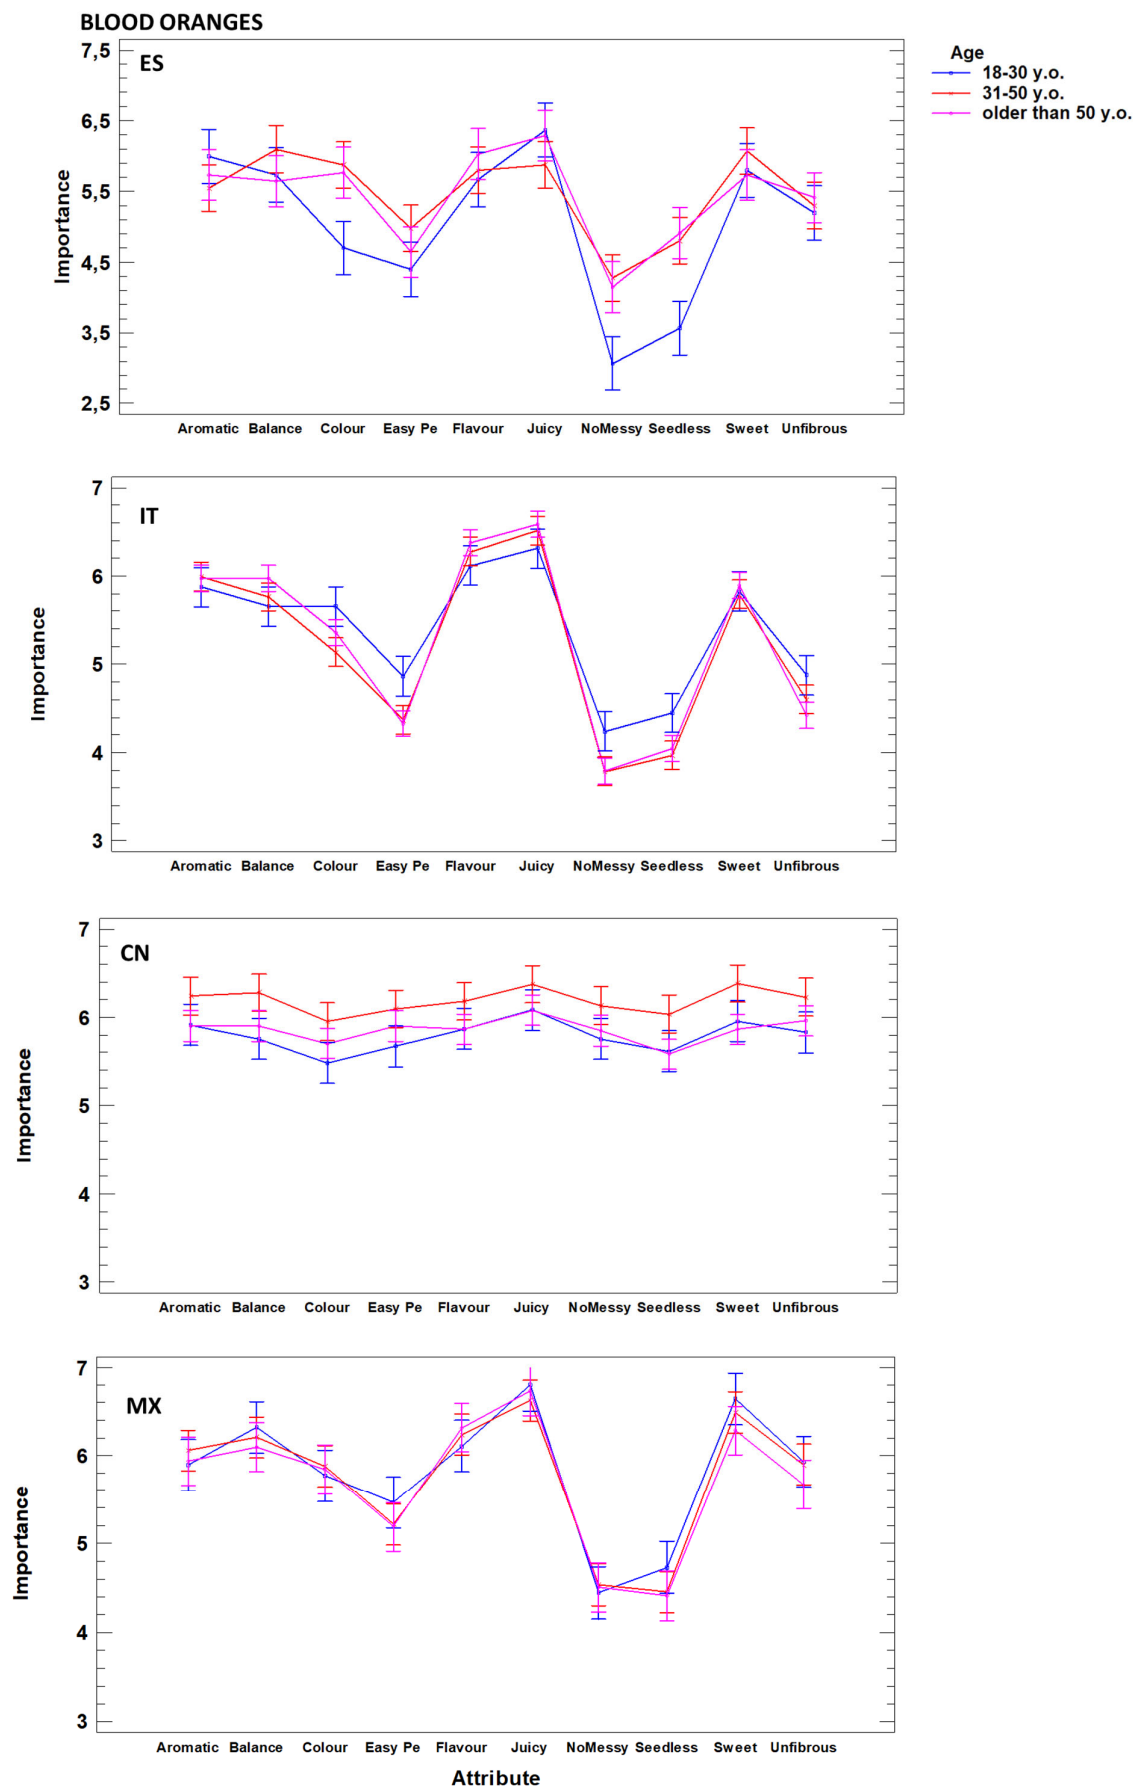

**Figure S5.** Effect of age range on the importance for satisfaction gave by consumers to different sensory attributes of blood oranges (1-not important at all, 7-very important). ES-Spain, IT-Italy, MX-Mexico, CN-China

**Table S4.** Percentage of participants (of those who stated consuming each orange type habitually) from each country who selected each consumption context.

| Spain                       |                             | Italy                      |                            |
|-----------------------------|-----------------------------|----------------------------|----------------------------|
| Blond                       | Blood                       | Blond                      | Blood                      |
| Dessert (77.9 %)            | Breakfast (54.8 %)          | Juice/Smoothy (68.1 %)     | Juice/Smoothy (66.7 %)     |
| Juice/Smoothy (70.0 %)      | Dessert (51.0 %)            | Snack home (63.5 %)        | Snack home (64.9 %)        |
| Breakfast (63.6 %)          | Snack home (44.2 %)         | Dessert (51.8 %)           | Dessert (45.8 %)           |
| Snack home (52.7 %)         | Juice/Smoothy (26.9 %)      | Cooked (40.6 %)            | Breakfast (40.7 %)         |
| Improve health (38.5 %)     | Snack out home (26.9 %)     | Ingredient (40.6 %)        | Cooked (31.7 %)            |
| Snack out home (38.1 %)     | Improve health (25.0 %)     | Breakfast (38.6 %)         | Ingredient (31.7 %)        |
| Ingredient (27.0 %)         | Child lunch-box (20.2 %)    | Snack out home (35.3 %)    | Snack out home (31.0 %)    |
| Child lunch-box (24.2 %)    | Cocktail (17.3 %)           | Improve health (34.2 %)    | Improve health (28.1 %)    |
| Cocktail (16.1 %)           | Ingredient (15.4 %)         | Cocktail (18.7 %)          | Cocktail (12.8 %)          |
| Restaurant (15.4 %)         | Restaurant (8.7 %)          | Child lunch-box (10.6 %)   | Child lunch-box (9.0 %)    |
| Weight loss (9.9 %)         | Weight loss (7.7 %)         | Weight loss (9.5 %)        | Weight loss (7.0 %)        |
| Sugar (7.9 %)               | Gift (5.8 %)                | Salt/chilly powder (4.7 %) | Gift (4.9 %)               |
| Gift (7.5 %)                | Sugar (4.8 %)               | Sugar (4.2 %)              | Salt/chilly powder (4.0 %) |
| Salt/chilly powder (2.6 %)  | Salt/chilly powder (1.0%)   | Gift (3.8 %)               | Restaurant (3.6 %)         |
| Cooked (1.7 %)              | Cooked (1.0%)               | Restaurant (3.6 %)         | Sugar (2.7 %)              |
| Mexico                      |                             | China                      |                            |
| Blond                       | Blood                       | Blond                      | Blood                      |
| Snack home (75.1 %)         | Snack home (66.2 %)         | Snack home (71.3 %)        | Snack home (65.8 %)        |
| Snack out home (70.3 %)     | Breakfast (65.7 %)          | Improve health (46.4 %)    | Improve health (42.1 %)    |
| Breakfast (64.2 %)          | Snack out home (63.3 %)     | Snack out home (42.6 %)    | Snack out home (39.2 %)    |
| Salt/chilly powder (63.8 %) | Dessert (46.9 %)            | Dessert (40.6 %)           | Dessert (33.1 %)           |
| Juice/Smoothy (49.6 %)      | Salt/chilly powder (46.4 %) | Juice/Smoothy (32.1 %)     | Breakfast (32.4 %)         |
| Improve health (47.2 %)     | Improve health (45.4 %)     | Gift (30.3 %)              | Gift (29.1 %)              |
| Dessert (46.5 %)            | Juice/Smoothy (37.7 %)      | Breakfast (22.4 %)         | Juice/Smoothy (25.2 %)     |
| Ingredient (40.0 %)         | Cocktail (34.8 %)           | Weight loss (22.4 %)       | Weight loss (24.5 %)       |
| Cocktail (32.7 %)           | Ingredient (31.4 %)         | Restaurant (18.6 %)        | Restaurant (17.3 %)        |
| Child lunch-box (31.7 %)    | Child lunch-box (29.0 %)    | Child lunch-box (13.0 %)   | Child lunch-box (12.2 %)   |
| Weight loss (14.9 %)        | Weight loss (16.4 %)        | Ingredient (7.8 %)         | Ingredient (8.6 %)         |
| Restaurant (8.3 %)          | Restaurant (11.6 %)         | Cocktail (4.7 %)           | Cocktail (5.0 %)           |
| Gift (8.1 %)                | Gift (8.7 %)                | Cooked (3.1 %)             | Cooked (1.8 %)             |
| Sugar (5.9 %)               | Sugar (5.3 %)               | Salt/chilly powder (2.2 %) | Salt/chilly powder (1.4 %) |
| Cooked (3.1 %)              | Cooked (3.4 %)              | Sugar (1.1 %)              | Sugar (0.7 %)              |



**Table S5.** Percentage of participants (of those who stated not consuming each orange type habitually)) from each country who selected each consumption barrier.

| Spain                                   |                                        | Italy                                   |                                         |
|-----------------------------------------|----------------------------------------|-----------------------------------------|-----------------------------------------|
| Blond                                   | Blood                                  | Blond                                   | Blood                                   |
| I prefer other fruits (67.5 %)          | I prefer other fruits (58.9 %)         | I prefer other fruits (60.0 %)          | I prefer other fruits (70.1 %)          |
| I don't know how to prepare it (12.0 %) | I don't like it (17.4 %)               | I don't like it (12.0 %)                | I don't like it (16.4 %)                |
| I don't like it (9.6 %)                 | I have never tasted it (13.2 %)        | Too expensive (6.0 %)                   | Too expensive (9.0 %)                   |
| Inconvenient (8.4 %)                    | I don't like the aspect (7.4 %)        | I don't like the aspect (4.0 %)         | I don't like the aspect (6.0 %)         |
| Too expensive (7.2 %)                   | Too expensive (6.8 %)                  | They are not natural (4.0 %)            | They are not natural (3.0 %)            |
| They are not natural (3.6 %)            | I don't know how to prepare it (1.6 %) | I don't know how to prepare it (2.0 %)  | I have never tasted it (2.2 %)          |
| I don't like the aspect (1.2 %)         | Inconvenient (0.0 %)                   | I think they are not safe (2.0 %)       | I think they are not safe (0.7 %)       |
| I have never tasted it (0.0 %)          | I think they are not safe (0.0 %)      | I have never tasted it (0.0 %)          | I don't know how to prepare it (0.0 %)  |
| I think they are not safe (0.0 %)       | They are not natural (0.0 %)           | Inconvenient (0.0 %)                    | Inconvenient (0.0 %)                    |
| Mexico                                  |                                        | China                                   |                                         |
| Blond                                   | Blood                                  | Blond                                   | Blood                                   |
| I prefer other fruits (61.3 %)          | I prefer other fruits (48.0 %)         | I prefer other fruits (36.4 %)          | I prefer other fruits (31.9 %)          |
| Too expensive (9.7 %)                   | I have never tasted it (28.0 %)        | Too expensive (22.9 %)                  | Too expensive (30.1 %)                  |
| I don't like the aspect (8.1 %)         | I don't like the aspect (15.0 %)       | I don't like it (21.4 %)                | I don't like it (27.9 %)                |
| I think they are not safe (6.5 %)       | Too expensive (13.0 %)                 | Inconvenient (15.7 %)                   | I have never tasted it (16.8 %)         |
| They are not natural (4.8 %)            | They are not natural (11.0 %)          | I don't know how to prepare it (11.4 %) | I don't like the aspect (15.5 %)        |
| I don't like it (3.2 %)                 | I don't know how to prepare it (8.0 %) | They are not natural (10.7 %)           | I don't know how to prepare it (13.7 %) |
| I don't know how to prepare it (3.2 %)  | I don't like it (6.0 %)                | I don't like the aspect (10.0 %)        | They are not natural (11.1 %)           |
| I have never tasted it (0.0 %)          | I think they are not safe (5.0 %)      | I think they are not safe (9.3 %)       | I think they are not safe (6.2 %)       |
| Inconvenient (0.0 %)                    | Inconvenient (0.0 %)                   | I have never tasted it (5.7 %)          | Inconvenient (0.0 %)                    |

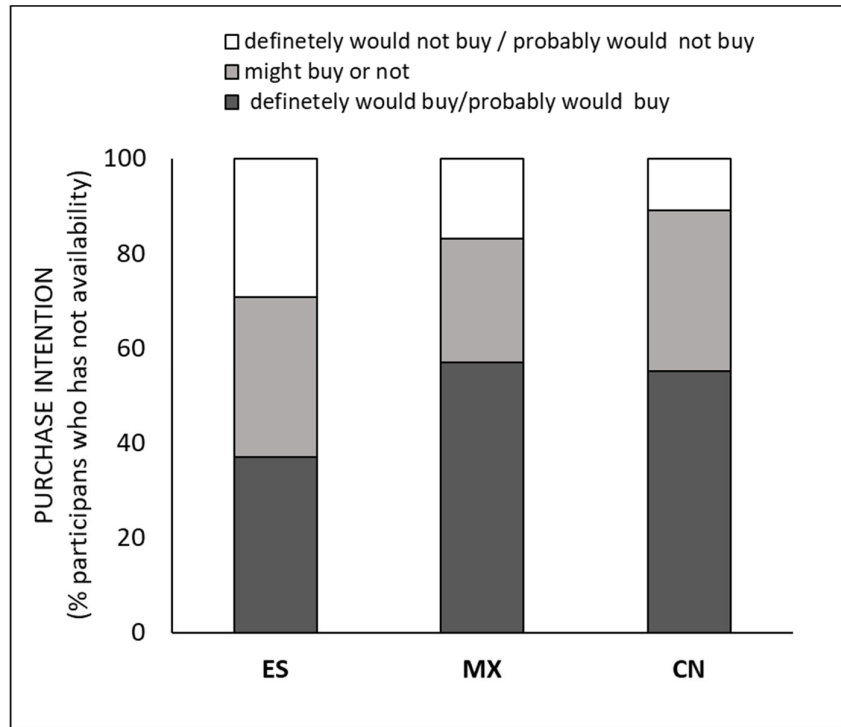

**Figure S6.** Purchase intention of those consumers for whom blood oranges are not available in their shopping place if oranges were available. ES-Spain, MX-Mexico, CN-China
